# Supplementary material for: PKMYT1, exacerbating the progression of clear cell renal cell carcinoma, is implied as a biomarker for the diagnosis and prognosis
Source: publisher site journal article supplement (doi:10.18632/aging.203759), 2021-12-27
Supplement: Supplementary file [file aging-v13i24-203759-supplementary-material-SD1.pdf]

## SUPPLEMENTARY FIGURE

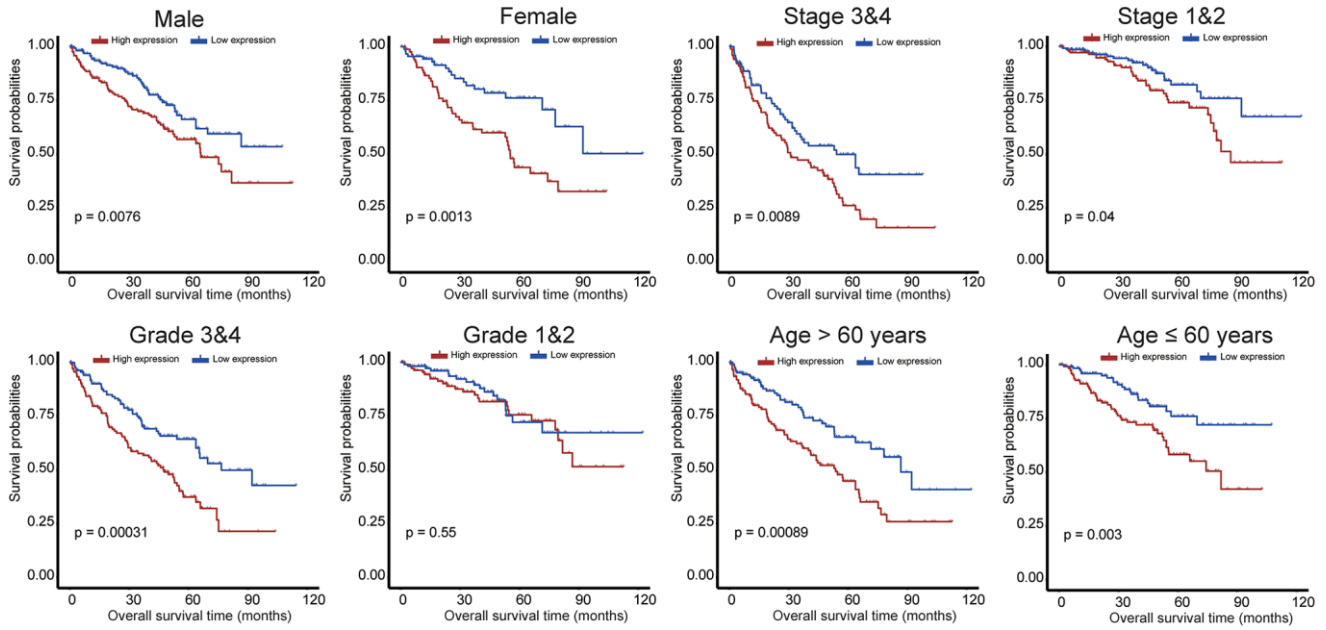

**Supplementary Figure 1. Survival analysis for ccRCC patients in different subgroups.** The PKMYT1 high expression group of tended to have worse prognosis in males, females, stage 3&4, stage 1&2, grade 3&4, age >60 years, and age ≤60 years. Survival analysis exhibited no significant difference in the grade 1&2 subgroups.
