# Supplementary material for: PKMYT1, exacerbating the progression of clear cell renal cell carcinoma, is implied as a biomarker for the diagnosis and prognosis
Source: Aging (Albany NY). 2021 Dec 27;13(24):25778–98. doi: 10.18632/aging.203759 (PMC8751600; doi:10.18632/aging.203759)
Supplement: Supplementary Table 1 [file aging-13-203759-s002.xlsx]

## Sheet: Sheet1
Supplementary Table 1. Genes in green module were highly correlated with the expressions of PKMYT1.
COL7A1
GTSE1
RARRES1
PHLDA2
COL4A4
COL4A3
CHST6
FAM134B
EDA
SPHK1
MCM10
SP5
CFH
C4orf19
VPS37D
IGFBP1
GJA3
SOX6
CFHR3
NUMBL
RTKN2
RNF180
MYBL1
NSUN7
DLGAP5
OIP5
CLCN5
C16orf74
C16orf75
NDC80
HOXA13
RAD54B
ZNF323
NMU
ERCC6L
VSIG10L
NFKBIL2
ASF1B
LOC283050
C3orf55
SPC25
SGSM1
AKR1B10
SRD5A2
HELLS
LOC285456
BDNFOS
C9orf140
BEX5
GRIN2B
TPPP
EN2
AKAP6
ORC1L
C1orf135
SMC1B
FAM64A
TMEM132A
CDC45
NTRK1
TRIM46
RNF152
C16orf59
HOXB13
FNDC4
GPR98
BRIP1
C3orf34
STIL
FKBP10
FRMD5
ZNF433
SIX2
FAM72D
FAM72B
FAM72A
DFNA5
WNT3
GPRIN1
ZBTB7C
C1S
C1R
TPX2
PAIP2B
PRSS3
PTGFRN
RECQL4
SPINK13
ACTN2
SAA2
SAA1
NKX3-2
PTPRH
ZDHHC15
TMEM45A
PLTP
UGT3A2
SULT4A1
TK1
SPSB1
S100A3
ZNF365
TUB
IGDCC4
CCNA1
RAI2
TMEM125
ZNF114
E2F7
E2F2
E2F1
E2F8
ACBD7
SKA3
PYCR1
HPCAL4
ZNF695
LAMB3
COPZ2
CLIC6
AURKA
AURKB
TNNT1
BRCA1
BRCA2
KIF23
XRCC2
LMNB1
CTSL2
MAD2L1
GLT25D2
FAAH2
ZP1
ATP8B3
KLHL35
TMEM92
NEB
ACHE
RIN1
ODZ3
C2orf27A
PTPRN
TCN1
TOP2A
THRB
PLP2
CDC6
CDC7
PLA2G4D
CCDC19
ALDH1L1
GK3P
GNG7
GNG4
CCNE2
HAR1B
HAR1A
CCNE1
CLDN3
CLDN4
IRF6
FAM78B
PANX2
C13orf34
PAQR5
SLN
CIDEC
POC1A
RORB
PARK2
PKP3
SGOL1
SGOL2
C6orf217
SLC18A3
C1orf210
PAEP
NCRNA00152
C5orf27
KCTD17
C6orf27
OXCT2
CIT
ASAM
TRPV3
SCG5
FAM59A
PAR-SN
ORC6L
SLC7A5
WFDC5
MYLK2
PPP2R2C
RDM1
RGS17
KIF4B
KIF4A
CLIP3
MND1
WDR76
IL31RA
KIF14
KRT19
MFSD2A
DMBT1
ANKRD13B
PDGFRL
MGC45800
DCX
MGC12982
SLPI
LYPD1
ULBP2
C5orf62
MFSD4
FAM47E
KIF20A
MKI67
ESCO2
MSX2
BUB1B
LHX2
B3GALT5
DRP2
CDC25C
GUCY2D
C21orf56
TCL6
GFPT2
GSG1
MTTP
FBN2
MEX3A
UBXN10
NR3C2
RUNX1
ADAMTSL5
C6orf141
C9orf44
DEPDC1
CYP1B1
FANCB
FANCA
CDK1
CEP55
CCDC91
C15orf42
UBE2C
UBE2T
BIRC5
DMC1
RPP40
BRSK1
LOC286467
DLX4
HIST1H2BH
GAS2L2
PAQR4
ANLN
GSG2
IL27RA
JPH2
NCAM1
AMZ1
SLITRK2
ARHGEF19
SHCBP1
PPEF1
LEF1
B4GALNT4
NLGN2
C1orf89
KIFC1
DMRT3
MT1X
MT1E
MT1F
MT1G
MT1A
CERCAM
CADM3
C17orf96
HTR1D
MMP7
GXYLT2
C12orf48
ANKRD56
PCBP3
FAM57B
FLJ11235
ARHGAP11A
ARHGAP11B
ARL9
RRM2
TF
C1QTNF1
C1QTNF6
PRR11
RAET1K
COL22A1
ERC2
MXRA8
LOC55908
MAT1A
LBP
TDRD5
FAM164C
ITPKA
C12orf24
NEIL3
CENPM
CXorf30
BAI2
SERPINF1
LOC645431
ZNF273
NCAPH
TRPM8
TUBB3
STK39
BCAS1
EFNA5
CDS1
LOC554202
MAP7
SERPINI1
ESRRG
FAM19A3
TFPI2
LRG1
NCAM2
CGN
CHRNA5
MT1DP
DISP2
RCC1
PI3
KCNH3
FOXM1
PTTG1
CABYR
BARX1
CHAF1B
RGS20
CDCA3
CDCA7
CDCA5
CDCA8
PTHLH
RHBDL2
SAA4
TMEM72
SHOX2
PEBP4
FAM90A1
SERPINA3
NEK2
KHDC1
CACNA1G
LMO1
C4BPA
RTN4RL1
CHEK2
GINS2
GINS1
GINS4
C3
FBXO43
EXPH5
AGPAT9
NUF2
PLLP
CCNF
IL1R2
TRO
CDC25A
RBPMS2
OVOL1
P2RX6
DLG2
RAB3IP
IFNE
MYBL2
C1orf21
NPC1L1
GNASAS
FAM7A3
PDE10A
GJB6
MYRIP
KIF18A
KIF18B
LIN7A
HS3ST3A1
SAMD5
GRIK4
SYBU
PADI3
WDR72
RIBC2
NKAIN1
CLSPN
TGFBI
VSTM2L
SEC14L2
AIF1L
EFHD1
USH2A
PKMYT1
C9orf170
SLC19A1
TMEM44
CDC20
RAD54L
IBSP
SERPINA4
PPP1R1A
MUC13
MUC12
MMP13
MMP19
PRG2
PLXNB3
BLM
GARNL3
SHISA4
CAMK2N2
WNT7B
CNTN2
CDC42BPG
BUB1
CNGA1
DNAH3
CDKL2
SKA1
GPR19
C11orf82
CKAP2L
IQGAP3
SCGB1D2
PANK1
CCNB2
CCNB1
SYT12
GPR173
ZIC2
GYLTL1B
HYAL1
SPC24
ASPM
WNT5B
WNT5A
CNTNAP1
CDKN3
SLC35E4
ANXA2P1
DIAPH3
POLR3G
TCF19
C5orf4
HMMR
MDK
IGSF5
CHRDL2
WDR62
LOC399815
SNHG3-RCC1
GPR153
F2
HTR3A
RTN2
LOC100188947
ARL4C
ADORA2B
KIF15
KIF11
CKS2
IGF2BP3
TRIM2
TRAIP
AIM1L
KCND1
TCAM1P
FOXA2
DKFZp434J0226
KIAA0101
ICAM5
CDH15
CDH16
PLK1
NEFM
NEFL
LOC100128191
RORC
HRASLS
PLK4
CPA4
ZNF385B
HMGA2
HJURP
C1orf203
PDIA2
CRB3
GK
TTK
LEMD1
MLLT11
HPDL
ATAD5
RASGEF1C
ESPL1
FAM20A
CTHRC1
UCN2
WDHD1
MLF1IP
MUC17
CYP4F2
C2orf58
POLQ
FANCD2
MNX1
MMP17
ZNF93
PITX2
PITX1
LOC100126784
TRIM54
MTBP
PPARGC1A
ULBP1
ADAMTS14
EYA1
HPR
FXYD2
WT1
EGFL6
IL20RB
HP
KREMEN2
WISP2
ADA
TFF2
KCNE1L
DEPDC1B
APBA2
TROAP
TLL2
INHBC
PBK
KIF21A
INHBE
APOBEC3B
CCNA2
NCAPG
LOC100270710
MCM8
EXO1
MOCOS
PIP5K1B
COBL
DNAJC12
EPR1
FMOD
PSRC1
EME1
BTBD11
SPOCK1
NCS1
C5orf34
C17orf53
FLJ36777
FGF5
TTYH1
ELOVL7
ELOVL3
FAM54A
LRRC8E
LRRN4CL
FAM83D
DGKG
TMEM25
LRP8
KIF7
ASTN2
TP73
GLS2
SLC38A5
ANK3
CDH1
CENPO
CENPK
CENPI
CENPH
CENPF
CENPE
CENPA
CENPW
CENPV
CENPP
PLEKHA7
PLEKHA9
TRIB3
CILP2
UHRF1
RLN2
DSCC1
EZH2
PRSS8
CASC5
AQP9
ENAM
CDK5R1
CDK5R2
MELK
FHL2
TYRO3
BSPRY
VASH2
UGT1A10
KCNS1
TRIP13
C19orf40
ELFN2
KDELR3
PRAME
SYNGR4
TSKU
STEAP3
GPR172B
DTL
EMX2
C12orf39
KIF2C
RCAN2
RAD51AP1
BEND6
GRAMD1C
CXorf22
MT2A
SPON2
FAM111B
MURC
KIRREL2
KIRREL3
LOC100130776
CDT1
CST2
RAD51
CEBPB
LINGO4
MAPK8IP1
MFI2
LOC152225
POLE2
SYN1
TMEFF1
NUSAP1
APLP1
RYR2
ENPP5
SLC2A4
C11orf70
EMX2OS
